# Supplementary material for: Association between Pet Ownership and Threatened Abortion in Pregnant Women: The China Birth Cohort Study
Source: MDPI journal article supplement (doi:10.3390/ijerph192316374), 2022-12-06
Supplement: s1 [file s1]

# **Associations between pet ownership and threatened abortion: The China Birth Cohort Study**

## **Table of Contents**

Table S1. Characteristics of all (n = 106,087), included (n = 84,964), and excluded (n = 21,123) participants.

Table S2. The adjusted ORs and 95%CI of pet ownership and threatened abortion after excluding special participants.

Table S3. Associations of pet owners without close contact with pets and in close contact with pets on threatened abortion, stratified by potential modifiers.

Table S4. Associations of cat ownership and dog ownership with threatened abortion, stratified by potential modifiers.

Figure S1. Participants' residential location in the present study (n = 84,964)

Table S1. Characteristics of all (n = 106,087), included (n= 84 964), and excluded (n= 21,123) participants.

| Variables                                         | All participants<br>(n = 106,087) | Participants<br>included in<br>the present<br>analysis<br>(n = 84,964) | Participants<br>excluded<br>from the<br>present<br>analysis<br>(n = 21,123) |
|---------------------------------------------------|-----------------------------------|------------------------------------------------------------------------|-----------------------------------------------------------------------------|
| Age ( $\geq 35$ years)                            | 13,367 (12.6)                     | 10,549 (12.4)                                                          | 2,818 (13.3)                                                                |
| Pre-pregnancy BMI ( $\geq 24$ kg/m <sup>2</sup> ) | 21,960 (20.7)                     | 17,495 (20.6)                                                          | 4,465 (21.1)                                                                |
| Daily working time<br>(Hours), mean (SD)          | 7.80 (2.36)                       | 7.78 (2.19)                                                            | 7.88 (2.55)                                                                 |
| Primigravida (Yes)                                | 51,558 (48.6)                     | 41,567 (48.9)                                                          | 9,991 (47.3)                                                                |
| Pre-pregnancy diseases <sup>1</sup> (Yes)         | 9,230 (8.7)                       | 7,358 (8.7)                                                            | 1,872 (8.9)                                                                 |
| History of abortion (Yes)                         | 32,781 (30.9)                     | 25,953 (30.5)                                                          | 6,828 (32.2)                                                                |
| Ethnicity                                         |                                   |                                                                        |                                                                             |
| Han                                               | 99,191 (93.5)                     | 79,735 (93.8)                                                          | 19,456 (92.1)                                                               |
| Minority ethnicities                              | 6,896 (6.5)                       | 5,229 (6.2)                                                            | 1,667 (7.9)                                                                 |
| Education levels                                  |                                   |                                                                        |                                                                             |
| University and above                              | 54,741 (51.6)                     | 43,775 (51.5)                                                          | 10,966 (51.9)                                                               |
| Below university                                  | 51,346 (48.4)                     | 41,189 (48.5)                                                          | 10,157 (48.1)                                                               |
| Average household income                          |                                   |                                                                        |                                                                             |
| $\geq 200,000$ yuan/year                          | 32,463 (30.6)                     | 26,304 (31.0)                                                          | 6,159 (29.2)                                                                |
| $< 200,000$ yuan/year                             | 73,624 (69.4)                     | 58,660 (69.0)                                                          | 14,964 (70.8)                                                               |
| Housing types                                     |                                   |                                                                        |                                                                             |
| High-rise apartment buildings                     | 92,402 (87.1)                     | 74,232 (87.4)                                                          | 18,170 (86.0)                                                               |
| Others <sup>2</sup>                               | 13,685 (12.9)                     | 10,732 (12.6)                                                          | 2,953 (14.0)                                                                |
| Singleton pregnancy (Yes)                         | 103,753 (97.8)                    | 83,376 (98.1)                                                          | 20,377 (96.5)                                                               |
| Conception ways                                   |                                   |                                                                        |                                                                             |
| Normal pregnancy                                  | 101,101 (95.3)                    | 80,981 (95.3)                                                          | 20,120 (95.3)                                                               |
| Assisted reproductive technology <sup>3</sup>     | 4,986 (4.7)                       | 3,983 (4.7)                                                            | 1,427 (4.7)                                                                 |
| Cigarette smoking                                 |                                   |                                                                        |                                                                             |
| Current or former                                 | 2,440 (2.3)                       | 1,956 (2.3)                                                            | 484 (2.3)                                                                   |
| Never                                             | 103,647 (97.7)                    | 83,008 (97.7)                                                          | 20,639 (97.7)                                                               |
| Alcohol consumption                               |                                   |                                                                        |                                                                             |
| Current or former                                 | 3,395 (3.2)                       | 2,736 (3.2)                                                            | 659 (3.1)                                                                   |
| Never                                             | 102,692 (96.8)                    | 82,228 (96.8)                                                          | 20,464 (96.9)                                                               |
| Pet species                                       |                                   |                                                                        |                                                                             |
| No pet ownership                                  | 95,481 (90.0)                     | 76,385 (89.9)                                                          | 19,096 (90.4)                                                               |
| Cat only                                          | 3,180 (3.0)                       | 2,537 (3.0)                                                            | 643 (3.0)                                                                   |
| Dog only                                          | 6,683 (6.3)                       | 5,466 (6.4)                                                            | 1,217 (5.8)                                                                 |
| Both cat and dog                                  | 743 (0.7)                         | 576 (0.7)                                                              | 167 (0.8)                                                                   |
| Pet exposure                                      |                                   |                                                                        |                                                                             |

|                                               |               |               |               |
|-----------------------------------------------|---------------|---------------|---------------|
| No pet ownership                              | 95,481 (90.0) | 76,385 (89.9) | 19,096 (90.4) |
| Pet owners without close contact with<br>pets | 3,498 (3.3)   | 2,780 (3.3)   | 718 (3.4)     |
| Close contact with pets                       | 7,108 (6.7)   | 5,799 (6.8)   | 1,309 (6.2)   |

---

Note: Values are presented as n (%) except where indicated.

<sup>1</sup> Pre-pregnancy diseases include heart diseases, diabetes, hypertension, thyroid diseases, reproductive tract diseases, periodontal diseases, and hepatitis B;

<sup>2</sup> Single-story, single-family, separated residences, or other houses which are not high-rise buildings;

<sup>3</sup> Assisted reproductive technology included in-vitro fertilization and artificial insemination.

Table S2. The adjusted ORs and 95%CI of pet ownership and threatened abortion after excluding special participants.

| Models                                                                            | n             | Pet ownership            |                   |
|-----------------------------------------------------------------------------------|---------------|--------------------------|-------------------|
|                                                                                   |               | OR (95%CI)               | P value           |
| After excluding cigarette smoking participants                                    | 83,008        | <b>1.28 (1.19, 1.39)</b> | <b>&lt; 0.001</b> |
| After excluding alcohol consumption participants                                  | 82,228        | <b>1.31 (1.21, 1.41)</b> | <b>&lt; 0.001</b> |
| After excluding multiple pregnancies participants                                 | 83,376        | <b>1.36 (1.25, 1.48)</b> | <b>&lt; 0.001</b> |
| After excluding assisted reproductive participants                                | 80,981        | <b>1.26 (1.09, 1.42)</b> | <b>&lt; 0.001</b> |
| After excluding participants with history of abortion                             | 59,011        | <b>1.31 (1.20, 1.43)</b> | <b>&lt; 0.001</b> |
| After excluding participants with pre-pregnancy diseases                          | 77,606        | <b>1.29 (1.19, 1.40)</b> | <b>&lt; 0.001</b> |
| After excluding participants from Beijing                                         | 58,989        | <b>1.14 (1.02, 1.35)</b> | <b>0.046</b>      |
| After excluding participants from Guangdong                                       | 74,397        | <b>1.25 (1.16, 1.35)</b> | <b>&lt; 0.001</b> |
| After excluding participants from Hainan                                          | 81,703        | <b>1.30 (1.20, 1.40)</b> | <b>&lt; 0.001</b> |
| After excluding participants from Hebei                                           | 82,723        | <b>1.30 (1.21, 1.40)</b> | <b>&lt; 0.001</b> |
| After excluding participants from Henan                                           | 79,901        | <b>1.30 (1.20, 1.40)</b> | <b>&lt; 0.001</b> |
| After excluding participants from Hunan                                           | 81,611        | <b>1.30 (1.21, 1.40)</b> | <b>&lt; 0.001</b> |
| After excluding participants from Jiangsu                                         | 83,481        | <b>1.31 (1.22, 1.41)</b> | <b>&lt; 0.001</b> |
| After excluding participants from Jiangxi                                         | 82,830        | <b>1.30 (1.20, 1.40)</b> | <b>&lt; 0.001</b> |
| After excluding participants from Liaoning                                        | 83,147        | <b>1.31 (1.21, 1.41)</b> | <b>&lt; 0.001</b> |
| After excluding participants from Inner Mongolia                                  | 83,248        | <b>1.30 (1.20, 1.40)</b> | <b>&lt; 0.001</b> |
| After excluding participants from Shandong                                        | 69,167        | <b>1.22 (1.13, 1.32)</b> | <b>&lt; 0.001</b> |
| After excluding participants from Sichuan                                         | 79,260        | <b>1.33 (1.23, 1.43)</b> | <b>&lt; 0.001</b> |
| After excluding participants from Tianjin                                         | 84,456        | <b>1.30 (1.21, 1.40)</b> | <b>&lt; 0.001</b> |
| After excluding participants from Yunnan                                          | 79,653        | <b>1.34 (1.24, 1.44)</b> | <b>&lt; 0.001</b> |
| After excluding participants from Gansu                                           | 84,944        | <b>1.31 (1.21, 1.41)</b> | <b>&lt; 0.001</b> |
| After excluding participants from Guizhou                                         | 84,958        | <b>1.31 (1.21, 1.41)</b> | <b>&lt; 0.001</b> |
| After excluding participants from Shaanxi                                         | 84,958        | <b>1.31 (1.21, 1.41)</b> | <b>&lt; 0.001</b> |
| After excluding participants from Jilin                                           | 84,959        | <b>1.31 (1.21, 1.41)</b> | <b>&lt; 0.001</b> |
| After excluding participants recruited from December 1 <sup>st</sup> 2019 onwards | 52,584        | <b>1.29 (1.19, 1.39)</b> | <b>&lt; 0.001</b> |
| <b>Additionally adjusted for number of pregnancies</b>                            | <b>84,964</b> | <b>1.30 (1.20, 1.41)</b> | <b>&lt; 0.001</b> |

Adjusted for average daily working hours, ethnicity, educational levels, average annual household income and house types.

Table S3. Associations of pet owners without close contact with pets and in close contact with pets on threatened abortion, stratified by potential modifiers.

| Variables              | n      | Pet exposures (OR, 95%CI, <i>P</i> difference) |                       |                         |                       |                            |                       |
|------------------------|--------|------------------------------------------------|-----------------------|-------------------------|-----------------------|----------------------------|-----------------------|
|                        |        | Pet owners without close contact with pets     | <i>P</i> <sup>1</sup> | Close contact with pets | <i>P</i> <sup>1</sup> | Pet ownership <sup>2</sup> | <i>P</i> <sup>1</sup> |
| Age                    |        |                                                | 0.459                 |                         | 0.110                 |                            | 0.258                 |
| < 35 years             | 74,415 | 1.13 (0.87, 1.31)                              |                       | 1.33 (1.19, 1.48)       |                       | 1.29 (1.19, 1.40)          |                       |
| ≥ 35 years             | 10,549 | 1.28 (1.14, 1.44)                              |                       | 1.67 (1.28, 2.14)       |                       | 1.46 (1.20, 1.77)          |                       |
| Pre-pregnancy BMI      |        |                                                | <b>0.032</b>          |                         | <b>0.008</b>          |                            | <b>0.021</b>          |
| < 24 kg/m <sup>2</sup> | 67,469 | 1.17 (1.01, 1.34)                              |                       | 1.27 (1.13, 1.43)       |                       | 1.23 (1.12, 1.34)          |                       |
| ≥ 24 kg/m <sup>2</sup> | 17,495 | 1.35 (1.15, 1.50)                              |                       | 1.77 (1.43, 2.17)       |                       | 1.52 (1.30, 1.78)          |                       |
| Education levels       |        |                                                | <b>0.027</b>          |                         | <b>0.038</b>          |                            | <b>0.019</b>          |
| University and above   | 43,775 | 1.25 (1.09, 1.43)                              |                       | 1.27 (1.13, 1.43)       |                       | 1.27 (1.16, 1.39)          |                       |
| Below university       | 41,189 | 1.44 (1.21, 1.76)                              |                       | 1.60 (1.33, 1.91)       |                       | 1.37 (1.20, 1.56)          |                       |
| Household income       |        |                                                | <b>0.030</b>          |                         | <b>0.006</b>          |                            | <b>0.001</b>          |
| ≥ 200 000 Yuan/year    | 26,304 | 1.14 (1.02-1.27)                               |                       | 1.13 (1.01-1.26)        |                       | 1.15 (1.03, 1.28)          |                       |
| < 200 000 Yuan/year    | 58,660 | 1.40 (1.20, 1.62)                              |                       | 1.58 (1.36, 1.81)       |                       | 1.47 (1.33, 1.63)          |                       |

Adjusted for average daily working hours, ethnicity, educational levels, average annual household income and house types, except for sometimes when they are used as the grouping variable.

<sup>1</sup> *P* difference < 0.05 suggests significant different OR values between the two subgroups;

<sup>2</sup> Pet ownership is a combination of pet owners without close contact with pets and close contact with pets.

Table S4. Associations of cat ownership and dog ownership with threatened abortion, stratified by potential modifiers.

| Variables              | n      | Pet species (OR, 95%CI, <i>P</i> difference) |                       |                   |                       |                   |                       | Pet ownership <sup>2</sup> | <i>P</i> <sup>1</sup> |
|------------------------|--------|----------------------------------------------|-----------------------|-------------------|-----------------------|-------------------|-----------------------|----------------------------|-----------------------|
|                        |        | Cats                                         | <i>P</i> <sup>1</sup> | Dogs              | <i>P</i> <sup>1</sup> | Both cat and dog  | <i>P</i> <sup>1</sup> |                            |                       |
| Age                    |        |                                              | 0.826                 |                   | 0.154                 |                   | 0.255                 |                            | 0.258                 |
| < 35 years             | 74,415 | 1.26 (1.09, 1.45)                            |                       | 1.29 (1.15, 1.43) |                       | 1.41 (1.02, 1.91) |                       | 1.29 (1.19, 1.40)          |                       |
| ≥ 35 years             | 10,549 | 1.42 (1.18, 1.86)                            |                       | 1.58 (1.21, 2.05) |                       | 0.75 (0.22, 1.89) |                       | 1.46 (1.20, 1.77)          |                       |
| Pre-pregnancy BMI      |        |                                              | <b>0.039</b>          |                   | <b>0.023</b>          |                   | 0.301                 |                            | <b>0.021</b>          |
| < 24 kg/m <sup>2</sup> | 67,469 | 1.14 (1.02, 1.34)                            |                       | 1.21 (1.07, 1.37) |                       | 1.45 (1.01, 2.01) |                       | 1.23 (1.12, 1.34)          |                       |
| ≥ 24 kg/m <sup>2</sup> | 17,495 | 1.56 (1.15, 2.07)                            |                       | 1.60 (1.30, 1.95) |                       | 0.89 (0.34, 1.92) |                       | 1.52 (1.30, 1.78)          |                       |
| Education levels       |        |                                              | <b>0.021</b>          |                   | <b>0.016</b>          |                   | 0.552                 |                            | <b>0.019</b>          |
| University and above   | 43,775 | 1.27 (1.09, 1.47)                            |                       | 1.24 (1.09, 1.40) |                       | 1.22 (0.82, 1.76) |                       | 1.27 (1.16, 1.39)          |                       |
| Below university       | 41,189 | 1.48 (1.27, 1.78)                            |                       | 1.44 (1.21, 1.69) |                       | 1.24 (0.57, 2.34) |                       | 1.37 (1.20, 1.56)          |                       |
| Household income       |        |                                              | <b>0.003</b>          |                   | <b>0.005</b>          |                   | 0.086                 |                            | <b>0.001</b>          |
| ≥ 200 000 Yuan/year    | 26,304 | 1.18 (1.09, 1.44)                            |                       | 1.12 (1.01, 1.29) |                       | 0.98 (0.59, 1.53) |                       | 1.15 (1.03, 1.28)          |                       |
| < 200 000 Yuan/year    | 58,660 | 1.36 (1.10, 1.67)                            |                       | 1.49 (1.30, 1.69) |                       | 1.67 (1.11, 2.42) |                       | 1.47 (1.33, 1.63)          |                       |

Adjusted for average daily working hours, ethnicity, educational levels, average annual household income and house types, except for sometimes when they are used as the grouping variable.

<sup>1</sup> *P* difference < 0.05 suggests significant different OR values between the two subgroups;

<sup>2</sup> Pet ownership is a combination of cats, dogs and both cat and dog.

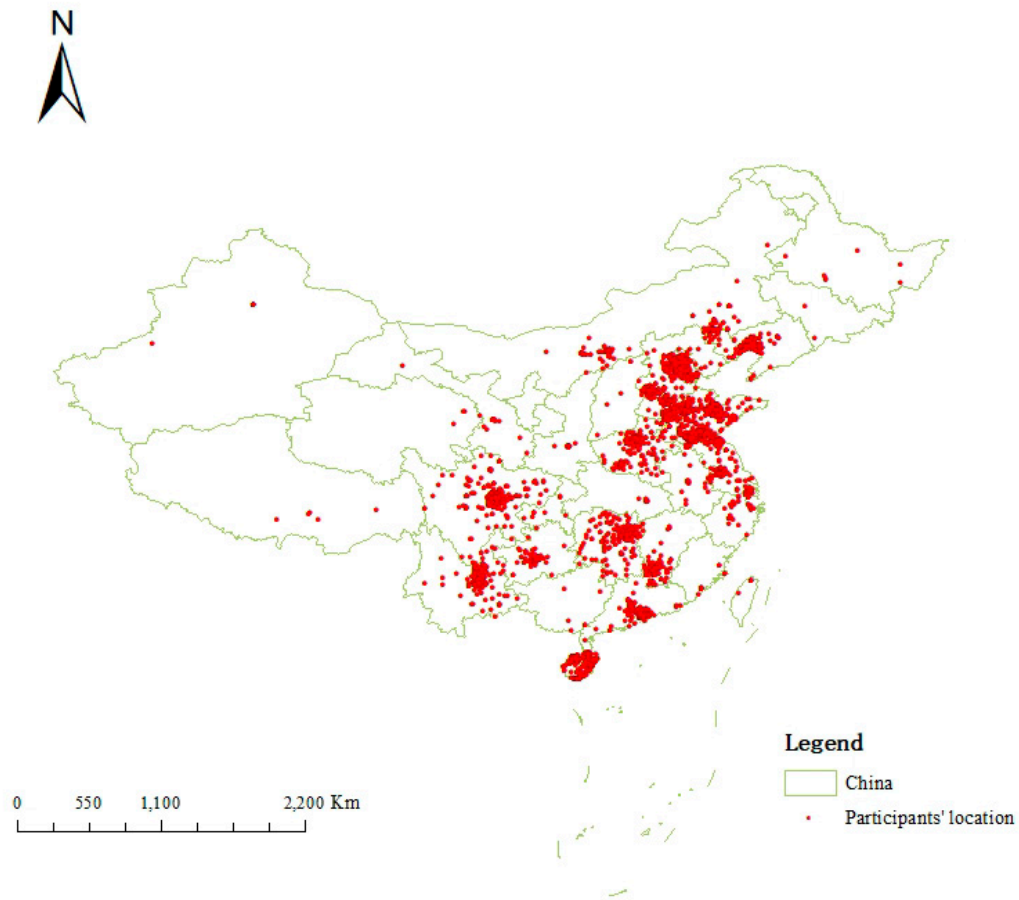

Figure S1. Participants' residential location in the present study (n = 84,964)
